# Supplementary material for: Morphological Differences between Larvae of the Ciona intestinalis Species Complex: Hints for a Valid Taxonomic Definition of Distinct Species
Source: PubMed Central journal article supplement (PMC4425531; doi:10.1371/journal.pone.0122879), 2015-05-08

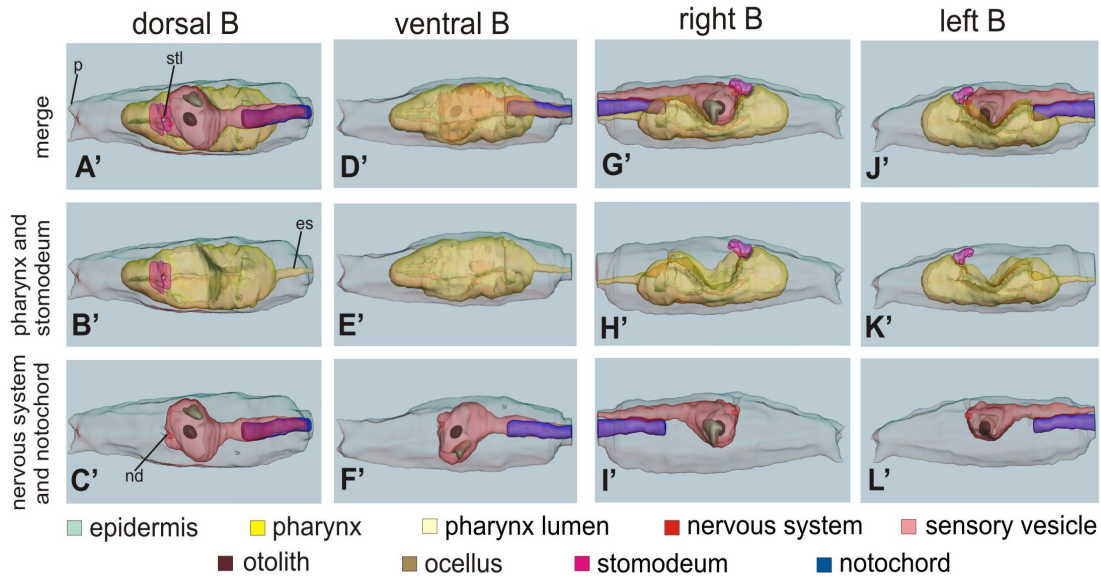

Supplement: pone.0122879.s004.pdf [file pone.0122879.s004.pdf]
